# Supplementary material
Source: PubMed Central journal article supplement (PMC4013226)
Supplement: NIHMS551061-supplement-Supporting_Information.pdf [file NIHMS551061-supplement-Supporting_Information.pdf]

# Web-based Supporting Materials for “Choosing profile double-sampling designs with application to PEPFAR evaluation” by An, Frangakis, and Yiannoutsos

Ming-Wen An <sup>1</sup>, Constantine E. Frangakis <sup>2</sup>, Constantin T. Yiannoutsos <sup>3</sup>

July 19, 2013

## Appendix

### *A.1. Description of EM algorithm.*

Complete data log likelihood. We consider the complete data log likelihood defined as the likelihood assuming  $R$  known:

$$\begin{aligned}\log P(\mathcal{D}_i, R_i \mid Z_i, \theta) &= R_i^{obs} \Delta_i \{ \log P(T_i \mid R_i = 1, Z_i, \theta) + \log P(R_i = 1 \mid Z_i, \theta) \} \\ &+ R_i^{obs} (1 - \Delta_i) \{ I(1 = R_i) \log \text{Surv}_{T,R=1}(C_i; Z_i, \theta) P(R_i = 1 \mid Z_i, \theta) \\ &\quad + I(0 = R_i) \log \text{Surv}_{L,R=0}(C_i; Z_i, \theta) P(R_i = 0 \mid Z_i, \theta) \} \\ &+ (1 - R_i^{obs}) \log P(L_i \mid R_i = 0, Z_i, \theta) P(R_i = 0 \mid Z_i, \theta) \\ &+ (1 - R_i^{obs}) S_i \Delta_i \log \text{Surv}_{T,R=0}(C_i; \text{Profile}_i, \theta) \\ &+ (1 - R_i^{obs}) S_i (1 - \Delta_i) \log \text{Surv}_{T,R=0}(C_i; \text{Profile}_i, \theta),\end{aligned}$$

---

<sup>1</sup>Department of Mathematics, Vassar College, Poughkeepsie, NY 12604, USA; mian@vassar.edu

<sup>2</sup>Department of Biostatistics, Johns Hopkins University, Baltimore, MD 21205, USA; cfrangak@jhsph.edu

<sup>3</sup>Division of Biostatistics, Indiana University School of Medicine, Indianapolis, IN 46202, USA; cyian-nou@iupui.edu

with  $\text{Surv}_{T,R=1}(c; \dots) = P(T_i > c \mid R_i = 1, \dots)$ ,  $\text{Surv}_{L,R=0}(c; \dots) = P(L_i > c \mid R_i = 0, \dots)$ ,

and  $\text{Surv}_{T,R=0}(c; \dots) = P(T_i > c \mid R_i = 0, \dots)$ .

E-Step. Let  $\theta_{(k)}$  be the current estimate of  $\theta$ , then

$$\begin{aligned}
Q(\theta; \theta_{(k)}) &= E\{\log P(\mathcal{D}_i, R_i \mid Z_i, \theta) \mid \mathcal{D}_i, \theta_{(k)}\} \\
&= R_i^{obs} \{\Delta_i \log P(T_i \mid R_i = 1, Z_i, \theta) + \log P(R_i = 1 \mid Z_i, \theta)\} \\
&\quad + R_i^{obs} (1 - \Delta_i) \{P(R_i = 1 \mid T_i > C_i, Z_i, \theta_{(k)}) \log \text{Surv}_{T,R=1}(C_i; Z_i, \theta) P(R_i = 1 \mid Z_i, \theta) \\
&\quad\quad + P(R_i = 0 \mid L_i > C_i, Z_i, \theta_{(k)}) \log \text{Surv}_{L,R=0}(C_i; Z_i, \theta) P(R_i = 0 \mid Z_i, \theta)\} \\
&\quad + (1 - R_i^{obs}) \log \{P(L_i \mid R_i = 0, Z_i, \theta) P(R_i = 0 \mid Z_i, \theta)\} \\
&\quad + (1 - R_i^{obs}) S_i \Delta_i \log \text{Surv}_{T,R=0}(C_i; \text{Profile}_i, \theta) \\
&\quad + (1 - R_i^{obs}) S_i (1 - \Delta_i) \log \text{Surv}_{T,R=0}(C_i; \text{Profile}_i, \theta)
\end{aligned}$$

where

$$P(R_i = 1 \mid T_i > C_i, Z_i, \theta_{(k)}) = \frac{p_{i,R1;\theta_{(k)}}}{p_{i,R1;\theta_{(k)}} + p_{i,R0;\theta_{(k)}}}$$

and

$$P(R_i = 0 \mid L_i > C_i, Z_i, \theta_{(k)}) = \frac{p_{i,R0;\theta_{(k)}}}{p_{i,R1;\theta_{(k)}} + p_{i,R0;\theta_{(k)}};$$

and

$$p_{i,R1;\theta_{(k)}} = \text{Surv}_{T,R=1}(C_i; Z_i, \theta_{(k)}) P(R_i = 1 \mid Z_i, \theta_{(k)})$$

and

$$p_{i,R0;\theta_{(k)}} = \text{Surv}_{L,R=1}(C_i; Z_i, \theta_{(k)}) P(R_i = 0 \mid Z_i, \theta_{(k)}).$$

M-Step. The log likelihood can be separated into distinct terms involving the partition  $(\theta_C, \theta_{T_1}, \theta_{T_0}, \theta_L)$  of the parameter space  $\theta$  as

$$\log P(\mathcal{D}_i, R_i | Z_i, \theta) = L_{\theta_{T_1}} + L_{\theta_{T_0}} + L_{\theta_L} + L_{\theta_R}$$

where

$$\begin{aligned} L_{\theta_{T_1}} &= \sum_{i \in \{(a)\}} \log P(T_i | Z_i, R_i = 1, \theta_{T_1}) + \sum_{i \in \{(b)\}} \omega_{i1} \log \text{Surv}_{T,R=1}(C_i; Z_i, \theta_{T_1}) \\ &\quad \text{with } w_{i1} = \frac{p_{R1;\theta(k)}}{p_{R1;\theta(k)} + p_{R0;\theta(k)}} \\ L_{\theta_{T_0}} &= \sum_{i \in \{(c)\}} \log P(T_i | L_i, Z_i, R_i = 0, \theta_{T_0}) + \sum_{i \in \{(d)\}} \log \text{Surv}_{T,R=0}(C_i; Z_i, L_i, \theta_{T_0}) \\ L_{\theta_L} &= \sum_{i \in \{(b)\}} \omega_{i0} \log \text{Surv}_{L,R=0}(C_i; Z_i, \theta_L) + \sum_{i \in \{(c),(d),(e)\}} \log P(L_i | R_i = 0, Z_i, \theta_L) \\ &\quad \text{with } w_{i0} = \frac{p_{R0;\theta(k)}}{p_{R1;\theta(k)} + p_{R0;\theta(k)}} \\ L_{\theta_R} &= \sum_{i \in \{(a),(b),(c),(d),(e)\}} \omega_{ir} \log P(R_i | Z_i, \theta_R) \\ &\quad \text{with } w_{ir} = \begin{cases} \frac{p_{Rr;\theta(k)}}{p_{R1;\theta(k)} + p_{R0;\theta(k)}} & \text{for } i \in (b); r = 0, 1 \text{ (on "expanded" dataset)} \\ 1 & \text{otherwise} \end{cases} \end{aligned}$$

where the groups (a), (b), (c), (d), and (e) correspond to those in Section 3.

Therefore the M-Step is equivalent to maximizing the terms separately.  $L_{\theta_{T_1}}$  and  $L_{\theta_L}$  can be maximized for any model for which survival analysis maximization can be performed with weights, and  $L_{\theta_R}$  can be maximized for any model for which weighted logistic regression can be performed.  $L_{\theta_{T_0}}$  can be maximized using numerical optimization methods. We used a Gauss-Seidel algorithm.

*A.2. Proof of Result 1.* By taking the second derivative of (4; as defined in the paper) and

defining

$$I(e(\cdot), \theta) = -E \left\{ S_i \frac{\partial^2}{\partial \theta^2} \ell_{\text{sample}}^{\text{dble}} \Big|_{\text{phase}}^{\text{first}} (\mathcal{D}_i; \theta) \mid \theta \right\},$$

the latter becomes  $= -E \left\{ S_i \frac{\partial^2}{\partial \theta^2} \ell_{\text{sample}}^{\text{dble}} \Big|_{\text{phase}}^{\text{first}} (\mathcal{D}_i; \theta) \mid R_i^{\text{obs}} = 0, \theta \right\} \cdot P(R_i^{\text{obs}} = 0 \mid \theta)$

because a person is double sampled ( $S_i = 1$ ) only if (but not necessarily if) they are observed dropouts ( $R_i^{\text{obs}} = 0$ ). By iterating the expectation in the latter expression over the variables  $\text{Profile}_i$  that determine the double-sampling rule, the last expression becomes

$$= -E \left[ E \left\{ S_i \frac{\partial^2}{\partial \theta^2} \ell_{\text{sample}}^{\text{dble}} \Big|_{\text{phase}}^{\text{first}} (\mathcal{D}_i; \theta) \mid R_i^{\text{obs}} = 0, \text{Profile}_i, \theta \right\} \mid R_i^{\text{obs}} = 0, \theta \right]$$

which, by design condition 2, becomes

$$\begin{aligned} &= E \left[ E \left\{ S_i \mid R_i^{\text{obs}} = 0, \text{Profile}_i, \theta \right\} \cdot E \left\{ -\frac{\partial^2}{\partial \theta^2} \ell_{\text{sample}}^{\text{dble}} \Big|_{\text{phase}}^{\text{first}} (\mathcal{D}_i; \theta) \mid R_i^{\text{obs}} = 0, \text{Profile}_i, \theta \right\} \mid R_i^{\text{obs}} = 0, \theta \right] \\ &= E \left\{ e(\text{Profile}_i) \delta(\text{Profile}_i, \theta) \mid R_i^{\text{obs}} = 0, \theta \right\}, \end{aligned}$$

where the last expression follows from (6; as defined in the paper) since, inside the conditioning on  $R_i^{\text{obs}} = 0$ , the factor  $(1 - R_i^{\text{obs}})$  is 1.

A.3. *Proof of Result 2.* Using notation defined in the paper, in particular,  $S(t | Z, \theta) := P(T > t | Z, \theta)$  and  $\tilde{S}(t | \theta) := \frac{1}{n} \sum_i S(t | Z_i, \theta)$ ,

$$\begin{aligned} & \sqrt{n} \left[ \tilde{S}(t | \hat{\theta}) - S(t | \theta) \right] \\ = & \sqrt{n} \left[ \tilde{S}(t | \hat{\theta}) - \tilde{S}(t | \theta) \right] + \sqrt{n} \left[ \tilde{S}(t | \theta) - S(t | \theta) \right] \\ = & \sqrt{n} \left[ \frac{\partial}{\partial \theta} \tilde{S}(t | \theta) \Big|_{\theta=\hat{\theta}} (\hat{\theta} - \theta) \right] \end{aligned} \tag{A.1}$$

$$- \sqrt{n} \left[ \frac{\partial^2}{\partial \theta^2} \tilde{S}(t | \theta) \Big|_{\theta=\xi} (\hat{\theta} - \theta)' (\hat{\theta} - \theta) / 2! \right] \tag{A.2}$$

$$+ \sqrt{n} \left[ \tilde{S}(t | \theta) - S(t | \theta) \right] \tag{A.3}$$

with the last equality following from a Taylor expansion of  $\tilde{S}(t | \theta)$  around  $\theta = \hat{\theta}$ , and where  $\xi$  is some vector whose elements  $\xi_j$  are between  $\theta_j$  and  $\hat{\theta}_j$ , for elements  $\theta_j$  and  $\hat{\theta}_j$  of  $\theta$  and  $\hat{\theta}$ , respectively.

Result 2 is obtained by applying Slutsky's Theorem to the following two facts:

FACT 1.  $\sqrt{n} \left[ \frac{\partial^2}{\partial \theta^2} \tilde{S}(t | \theta) \Big|_{\theta=\xi} (\hat{\theta} - \theta)' (\hat{\theta} - \theta) / 2! \right] \xrightarrow{p} 0$ .

FACT 2.  $\sqrt{n} \left[ \frac{\partial}{\partial \theta} \tilde{S}(t | \theta) \Big|_{\theta=\hat{\theta}} (\hat{\theta} - \theta) \right] + \sqrt{n} \left[ \tilde{S}(t | \theta) - S(t | \theta) \right] \xrightarrow{d} N(0, V(e(\cdot), \theta))$ ,

where  $V(e(\cdot), \theta) = E_\theta \{ S_\theta(t | \theta)' \} I(e(\cdot), \theta)^{-1} E_\theta \{ S_\theta(t | \theta) \} + \text{var}_\theta \{ S(t | Z_i, \theta) \}$ ,

and  $S_\theta(t | \theta) = \partial S(t | \theta) / \partial \theta$ .

We now verify the two facts.

*Proof of Fact 1.* Under regularity conditions, we have the following standard result from maximum likelihood estimation theory:  $\sqrt{n}(\hat{\theta} - \theta) \xrightarrow{d} N(0, I(e(\cdot), \theta)^{-1})$ . Then  $n(\hat{\theta} - \theta)'(\hat{\theta} - \theta)$

converges in distribution to some chi-squared distribution, and so

$$\begin{aligned} & \frac{(\hat{\theta} - \theta)'(\hat{\theta} - \theta)}{n^{\delta-1}} \xrightarrow{p} 0 \\ \Rightarrow & (\hat{\theta} - \theta)'(\hat{\theta} - \theta) = o_p(n^{\delta-1}) \end{aligned}$$

for any  $\delta > 0$ . Letting  $\delta = 1/2$ , we have  $(\hat{\theta} - \theta)'(\hat{\theta} - \theta) = o_p(1/\sqrt{n})$ , or equivalently,

$$\sqrt{n}(\hat{\theta} - \theta)'(\hat{\theta} - \theta) \xrightarrow{p} 0. \quad (\text{A.4})$$

Moreover, by the law of large numbers, we have:

$$\frac{\partial^2}{\partial \theta^2} \tilde{S}(t | \theta) \Big|_{\theta=\hat{\theta}} \xrightarrow{p} E \left[ \frac{\partial^2}{\partial \theta^2} S(t | Z_i, \theta) \right]. \quad (\text{A.5})$$

Therefore applying Slutsky's Theorem to (A.4) and (A.5), we have that

$$\sqrt{n} \left[ \frac{\partial^2}{\partial \theta^2} \tilde{S}(t | \theta) \Big|_{\theta=\hat{\theta}} (\hat{\theta} - \theta)'(\hat{\theta} - \theta) / 2! \right] \xrightarrow{p} 0.$$

*Proof of Fact 2.* We will show that  $\varphi(\mathcal{D}_i)$  and  $S(t | Z_i, \theta) - S(t | \theta)$  are asymptotically independently normal:

$$\sqrt{n}(\hat{\theta} - \theta) \xrightarrow{d} N(0, I((e(\cdot), \theta))^{-1})$$

and

$$\sqrt{n} \left[ \tilde{S}(t | \theta) - S(t; \theta) \right] \xrightarrow{d} N(0, \text{var}_{\theta}\{S(t | Z_i, \theta)\}) \quad (\text{A.6})$$

are asymptotically independent. Further, by the strong law of large numbers, we have:

$$\frac{\partial}{\partial \theta} \tilde{S}(t | \theta) \Big|_{\theta = \hat{\theta}} \xrightarrow{p} E_{\theta} \left[ \frac{\partial}{\partial \theta} S(t | \theta) \right].$$

Then we obtain Fact 2 by application of Slutsky's Theorem:

$$\sqrt{n} \frac{\partial}{\partial \theta} \tilde{S}(t | \theta) \Big|_{\theta = \hat{\theta}} (\hat{\theta} - \theta) + \sqrt{n} \left[ \tilde{S}(t | \theta) - S(t; \theta) \right] \xrightarrow{d} N(0, V(e(\cdot), \theta)),$$

where  $V(e(\cdot), \theta) = E_{\theta}\{S_{\theta}(t | \theta)'\} - I(e(\cdot), \theta)^{-1} E_{\theta}\{S_{\theta}(t | \theta)\} + \text{var}_{\theta}\{S(t | Z_i, \theta)\}$ , and  $S_{\theta}(t | \theta) = \partial S(t | \theta) / \partial \theta$ .

We now verify (A.6) by showing that  $\varphi(\mathcal{D}_i)$  and  $S(t | Z_i, \theta) - S(t | \theta)$  are jointly asymptotically normal with zero covariance. Using the theory of influence functions, we can express  $\sqrt{n}(\hat{\theta} - \theta)$  from (A.1) in a linearized form as follows:

$$\sqrt{n}(\hat{\theta} - \theta) = \sqrt{n} \frac{1}{n} \sum_{i=1}^n \varphi(\mathcal{D}_i | Z_i),$$

where  $\varphi(x) = I^{-1}(\theta) \frac{\partial}{\partial \theta} \log f(x | \theta)$ . Since  $\varphi(\mathcal{D}_i)$  and  $S(t; \theta, Z_i) - S(t; \theta)$  are data from individuals, we have

$$\sqrt{n} \sum_{i=1}^n \begin{pmatrix} \varphi(\mathcal{D}_i) \\ S(t | Z_i, \theta) - S(t | \theta) \end{pmatrix} \xrightarrow{d} N \begin{pmatrix} 0 \\ 0 \end{pmatrix}, V_1, \quad (\text{A.7})$$

where

$$V_1 = \begin{pmatrix} E_{\theta}[\varphi(\mathcal{D}_i)' \varphi(\mathcal{D}_i)] & \text{cov}[\varphi(\mathcal{D}_i), S(t | Z_i, \theta) - S(t | \theta)] \\ \text{cov}[\varphi(\mathcal{D}_i), S(t | Z_i, \theta) - S(t | \theta)] & \text{var}_{\theta}\{S(t | Z_i, \theta)\} \end{pmatrix}.$$

We now show the covariance term is 0:

$$\begin{aligned}
\text{cov}[\varphi(\mathcal{D}_i), S(t|Z_i, \theta) - S(t|\theta)] &= E_\theta\{\varphi(\mathcal{D}_i) \cdot [S(t|Z_i, \theta) - S(t|\theta)]\} \\
&= E_Z\{E_\theta\{\varphi(\mathcal{D}_i) \cdot [S(t; \theta, Z_i) - S(t; \theta)] \mid Z\}\} \\
&= E_Z\{E_\theta\{I^{-1}(\theta) \frac{\partial}{\partial \theta} \log f(\mathcal{D}_i \mid \theta) \cdot [S(t|Z_i, \theta) - S(t \mid \theta)] \mid Z\}\} \\
&= 0,
\end{aligned}$$

where the last equality follows since the score function,  $\frac{\partial}{\partial \theta} \log f(\mathcal{D}_i \mid \theta)$ , has zero expectation with respect to  $\theta$  given  $Z$ , and the remaining product terms are constant given  $Z$ . Therefore

$$\sqrt{n}(\hat{\theta} - \theta) \xrightarrow{d} N(0, I(e(\cdot), \theta)^{-1})$$

and

$$\sqrt{n} [\tilde{S}(t \mid \theta) - S(t; \theta)] \xrightarrow{d} N(0, \text{var}_\theta\{S(t \mid Z_i, \theta)\})$$

are asymptotically independent, where  $I(e(\cdot), \theta)^{-1} = E_\theta[\varphi(\mathcal{D}_i)\varphi(\mathcal{D}_i)']$ .
